# Supplementary material for: Amorphous nitride semiconductors with highly tunable optical and electronic properties: the benefits of disorder in Ca–Zn–N thin films
Source: Royal Society of Chemistry journal article supplement (doi:10.1039/d4mh01525h), 2024-12-16
Supplement: d4mh01525h1.zip [file d4mh01525h1.zip]

## Sheet: Document map
	Summary
	Ohmic check
		1-3
		2-4
	Resistivity measurement
	DC field Hall measurement

## Sheet: Summary
Hall measurement
Run-time operator
Sirotti
Sample
ID:		SB230727
Type:		van der Pauw
Thickness
t [nm]:		125
Other dimensions
Lp [mm]:		32
Hall factor:		1
Max voltage [V]:		20
Max current [mA]:		20
Gate bias voltage [V]:		0
Comment:
Final results
				Mean value		Limit
µH	Hall mobility [cm²/V∙s]			50.9077
	Carrier type			N		1
n	Carrier concentration [1/cm³]			1.75879e+18
nsheet	Sheet carrier concentration [1/cm²]			2.19849e+13
RH	Hall coefficient [cm³/C]			3.54875
RHsheet	Sheet Hall coefficient [cm²/C]			283900
ρ	Resistivity [Ω∙cm]			0.0697094
ρsheet	Sheet resistivity [Ω/□]			5576.75
VH	Hall voltage [V]			-0.0102194
	Phase [deg.]
	Worst case Ohmic check correlation (2-4)			0.994675
Measurement comment

## Sheet: Ohmic check
Ohmic check
Setup
Resistance measurement method:				High resistance
Contact sequence:				1-3, 2-4, (5-6)
Excitation current
Min current [μA]:				1
Max current [μA]:				500
Spacing				Linear spacing
Number of points:				4
Wait mode:				Auto
Current scanning method:				Max to min
Environment
	Start		Finish		Average		Status
Date	Tuesday, January 16, 2024		Tuesday, January 16, 2024
Time	10:08:24 AM		10:11:40 AM
Temperature [K]	N/A		N/A		N/A		OK
Field [G]	0		0
Gate bias voltage [V]	N/A		N/A
Gate bias current [A]	N/A		N/A

## Sheet: 1-3
Ohmic check 1-3
Set current [A]	Current [A]		Voltage [V]	Resistance [Ω]
-0.0005	-0.00049981		-4.77748	9558.59
-0.000333667	-0.000333535		-3.20355	9604.85
-0.000167333	-0.000167436		-1.60929	9611.4
-1e-06	-1.00004e-06		-0.00958168	9581.26
1e-06	1.00006e-06		0.00971299	9712.43
0.000167333	0.000167199		1.61914	9683.86
0.000333667	0.000333738		3.23361	9689.06
0.0005	0.00050007		4.84142	9681.48

## Sheet: 2-4
Ohmic check 2-4
Set current [A]	Current [A]		Voltage [V]	Resistance [Ω]
-0.0005	-0.0004998		-5.77519	11555
-0.000333667	-0.000333531		-3.9939	11974.6
-0.000167333	-0.000167439		-2.20311	13157.7
-1e-06	-9.99933e-07		-0.020626	20627.3
1e-06	1.00011e-06		0.0208771	20874.8
0.000167333	0.000167201		3.29515	19707.7
0.000333667	0.000333724		5.69648	17069.4
0.0005	0.00050005		7.58966	15177.8

## Sheet: Resistivity measurement
Resistivity measurement
Setup
Resistance measurement method:						High resistance
Excitation current						Manual
Current [μA]:						400
Current reversal:						Yes
General
Sample geometry:						Geometry averaged
Average count:						5
Wait mode:						Auto
Measure current lead voltages:						No
Environment
		Start		Finish				Average			Status
Date		Tuesday, January 16, 2024		Tuesday, January 16, 2024
Time		10:11:43 AM		10:13:25 AM
Temperature [K]		N/A		N/A				N/A			OK
Field [G]		0		0
Gate bias voltage [V]		N/A		N/A
Gate bias current [A]		N/A		N/A
Final average					Geometry A				Geometry B
					Mean value		Limit		Mean value			Limit
ρ	Resistivity [Ω∙cm]				0.069694				0.0697248
ρsheet	Sheet resistivity [Ω/□]				5575.52				5577.99
	F value				0.99				0.99
Intermediate results					Geometry A				Geometry B
					R2134		R3241		R4312			R1423
	Resistance [Ω]				1076.3		1398.62		1077.98			1397.8
	Standard deviation of resistance [Ω]				0.03508		0.0376164		0.0301648			0.0234836
	Voltage [V]				0.430486		0.559395		0.431142			0.559062
	Standard deviation of voltage [V]				1.39018e-05		1.4735e-05		1.19484e-05			9.21164e-06
	Current [A]				0.00039997		0.000399963		0.000399954			0.000399957
	Standard deviation of current [A]				1.76494e-09		2.17284e-09		1.54919e-09			1.31206e-09
Average measurements (I+)					Geometry A				Geometry B
					R2134		R3241		R4312			R1423
	Voltage [V]				0.430169		0.560337		0.432228			0.5582
	Standard deviation of voltage [V]				1.62273e-05		2.22591e-05		7.12027e-06			9.38269e-06
	Current [A]				0.000400107		0.000400099		0.000400087			0.000400091
	Standard deviation of current [A]				2.18815e-09		3.41423e-09		2.52646e-09			2.02805e-09
	Current lead voltage [DC V]				N/A		N/A		N/A			N/A
Average measurements (I-)					Geometry A				Geometry B
					R2134		R3241		R4312			R1423
	Voltage [V]				-0.430804		-0.558452		-0.430056			-0.559923
	Standard deviation of voltage [V]				2.25767e-05		1.93136e-05		2.28114e-05			1.5855e-05
	Current [A]				-0.000399832		-0.000399827		-0.000399821			-0.000399823
	Standard deviation of current [A]				2.76984e-09		2.68849e-09		1.7936e-09			1.66523e-09
	Current lead voltage [DC V]				N/A		N/A		N/A			N/A

## Sheet: DC field Hall measurement
DC field Hall measurement
Setup
Resistance measurement method:						High resistance
Excitation field
Field [kG]:						9
Field reversal:						Yes
Excitation current						Manual
Current [μA]:						400
Current reversal:						Yes
General
Sample geometry:						Geometry averaged
Average count:						10
Wait mode:						Auto
Measure current lead voltages:						No
Environment
		Start		Finish				Average			Status
Date		Tuesday, January 16, 2024		Tuesday, January 16, 2024
Time		10:13:26 AM		10:16:05 AM
Temperature [K]		N/A		N/A				N/A			OK
Field [G]		9000		9000
Gate bias voltage [V]
Gate bias current [A]
Final average					Geometry C				Geometry D
					Mean value		Limit		Mean value			Limit
VH	Hall voltage [V]				-0.0104936				-0.0099452
	Carrier type				N		1		N			1
n	Carrier concentration [1/cm³]				1.71283e+18				1.80728e+18
nsheet	Sheet carrier concentration [1/cm²]				2.14104e+13				2.25911e+13
RH	Hall coefficient [cm³/C]				3.64396				3.45353
RHsheet	Sheet Hall coefficient [cm²/C]				291517				276282
Intermediate results					Geometry C				Geometry D
					I+		I-		I+			I-
VH	Hall voltage [V]				-0.0104895		0.0104976		-0.00982565			0.0100647
Average Measurements (B+)					Geometry C				Geometry D
					I+		I-		I+			I-
	Voltage [V]				0.121761		-0.116093		-0.139187			0.138932
	Standard deviation of voltage [V]				4.24275e-05		0.000123215		6.63462e-05			1.90426e-05
	Current [A]				0.000400094		-0.000399829		0.000400082			-0.000399833
	Current lead voltage [DC V]				N/A		N/A		N/A			N/A
Average Measurements (B-)					Geometry C				Geometry D
					I+		I-		I+			I-
	Voltage [V]				0.14274		-0.137089		-0.119536			0.118803
	Standard deviation of voltage [V]				5.7389e-05		0.000124401		4.29023e-05			2.14432e-05
	Current [A]				0.000400093		-0.000399828		0.000400096			-0.000399835
	Current lead voltage [DC V]				N/A		N/A		N/A			N/A
